# Supplementary material for: Shear induced self-thickening in chitosan-grafted polyacrylamide aqueous solution
Source: Royal Society of Chemistry journal article supplement (doi:10.1039/c2sm27404c), 2012-12-17
Supplement: c2sm27404c.pdf [file c2sm27404c.pdf]

**Supporting information for**  
**Shear-induced self-thickening in chitosan-grafted polyacrylamide**  
**aqueous solution**

**Lei Jin<sup>a</sup> Yonggang Shangguan<sup>a\*</sup> Tao Ye<sup>a</sup> Hu Yang<sup>b</sup> Quanfu An<sup>a</sup> and Qiang Zheng<sup>a\*</sup>**

<sup>a\*</sup>*MOE Key Laboratory of Macromolecular Synthesis and Functionalization, Department of Polymer Science and Engineering, Zhejiang University, Hangzhou 310027, China.*

<sup>b</sup>*Key Laboratory for Mesoscopic Chemistry of MOE, Department of Polymer Science & Technology, School of Chemistry & Chemical Engineering, Nanjing University, Nanjing 210093, China*

*E-mail: shangguan@zju.edu.cn (YG. Shangguan), zhengqiang@zju.edu.cn (Q. Zheng).*

**Elemental analysis (EA)**

**Table S1** shows the elemental analysis results of GPAM and calculated graft ratio.

The calculation process is shown as follows.

**Table S1.** The elemental analysis results of GPAM and calculated graft ratio.

| Sample | N(%)  | C(%)  | H(%) | Graft Ratio(%) |
|--------|-------|-------|------|----------------|
| GPAM1  | 8.28  | 33.50 | 6.18 | 70.8           |
| GPAM2  | 13.55 | 40.27 | 6.88 | 324            |
| GPAM3  | 13.10 | 36.89 | 6.51 | 481            |

Calculation process:

Let the mass fraction  $W_{CS} = x$ ,  $W_{PAM} = y$  and the  $W_{impurity}$  (the moisture and bonded water content of Chitosan) =  $z$ , and  $x+y+z=1$ , as equation(3). Equation(1) indicates the measured content of N(N%) and equation(2) the calculated O content, based on the theoretical content of Chitosan and PAM in **Table S2**. Then  $x$  and  $y$  are calculated from the equation set and final graft ratio equals to  $y/x$ .

**Table S2.** The theoretical content of each element in the chosen chitosan and PAM.

| Elements | Chitosan(CS) | PAM   |
|----------|--------------|-------|
| N(%)     | 6.89         | 19.72 |
| O(%)     | 34.16        | 22.54 |

$$\begin{cases} W_{CS} = x; \\ W_{PAM} = y; \\ W_{impurity} = z; \end{cases} \quad \begin{cases} N\% = 7.41\%x + 19.72\%y \dots\dots\dots(1) \\ 33.86\%x + 22.54\%y = 1 - (N + C + H)\% - z \dots\dots(2) \\ x + y + z = 1 \dots\dots\dots(3) \end{cases}$$

$$G\% = \frac{y}{x}$$

## Rheology

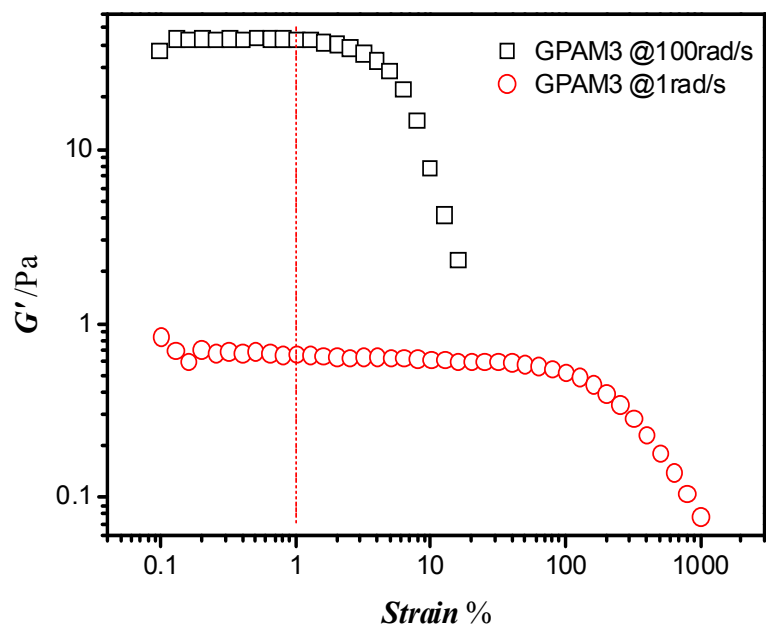

**Figure S1.** Strain sweep for 1 wt% GPAM3 solution and the LVR was determined.

**Fig.S1** gives strain sweep results for 1 wt% GPAM3 solution. whole frequency range in dynamic rheological experiments is involved in the linear viscoelastic region.

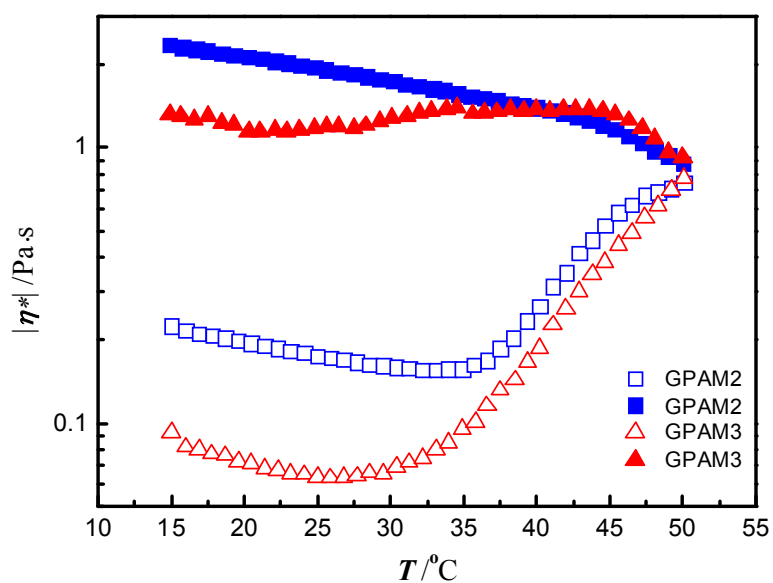

**Figure S2.** Thermo-thickening for 1 wt% GPAM solutions at the rate of 2.5 °C/min (heating, open; cooling, solid; strain  $\gamma=1\%$ , angular frequency  $\omega=6.28$  rad/s).

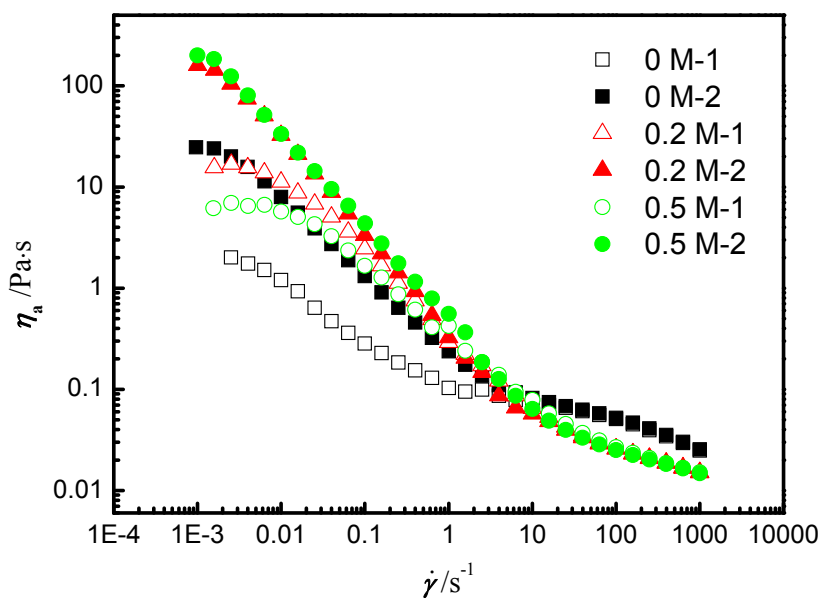

**Figure S3.** Influences of added salt (NaCl, 0.2 M and 0.5 M) on steady flow curves of 0.75 wt% GPAM3 solutions before (open,1) and after (solid,2) shear-induced thickening for 30 min.
